# Supplementary material for: Malva parviflora Leaves Mucilage: An Eco-Friendly and Sustainable Biopolymer with Antioxidant Properties
Source: MDPI journal article supplement (doi:10.3390/polym13234251), 2021-12-03
Supplement: s1 [file s1]

***Malva parviflora* Leaves Mucilage: An Eco-friendly and Sustainable Biopolymer with Antioxidant Properties**

**Supplementary materials**

**Figure S1:** GC/MS chromatograms for standard neutral (A) and acidic (B) monosaccharides

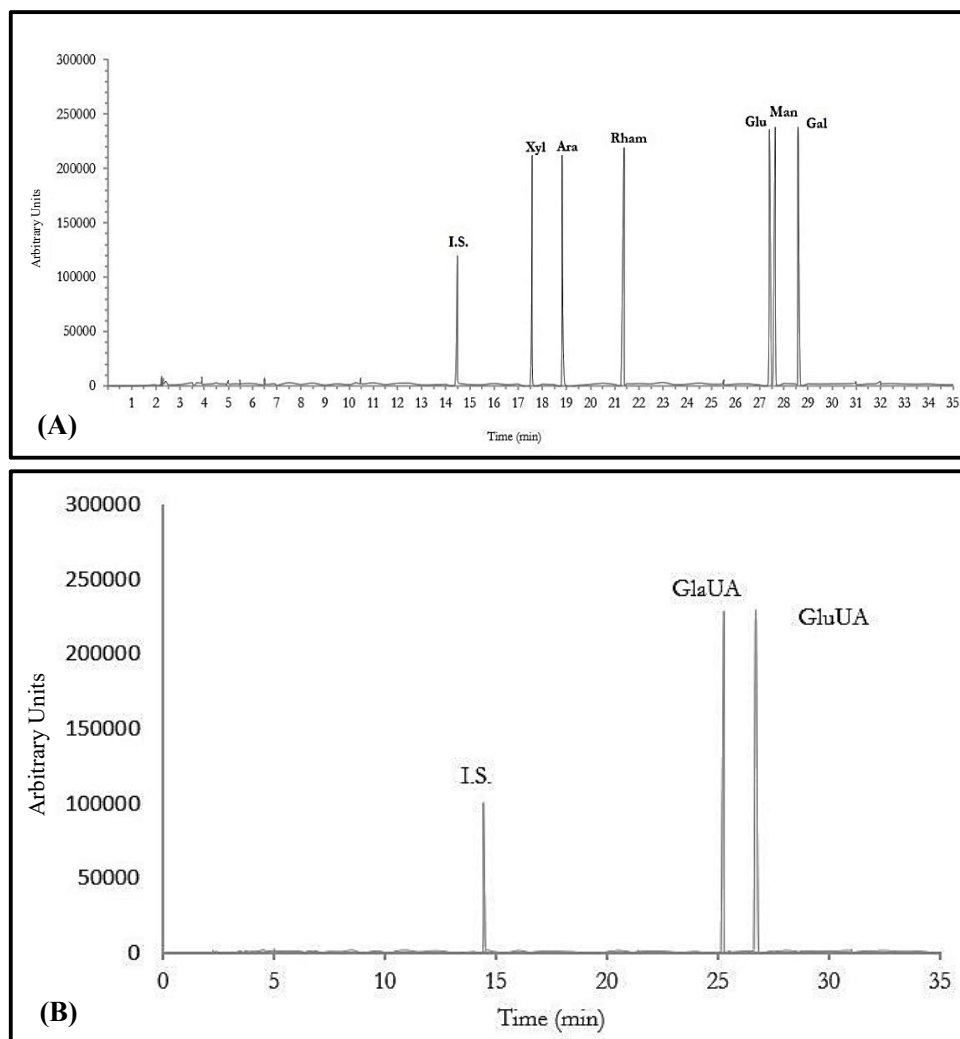

**Figure S1:** GC/MS chromatograms for standard neutral (A) and acidic (B) monosaccharides
